# Supplementary material
Source: PubMed Central journal article supplement (PMC4302162)

**A.**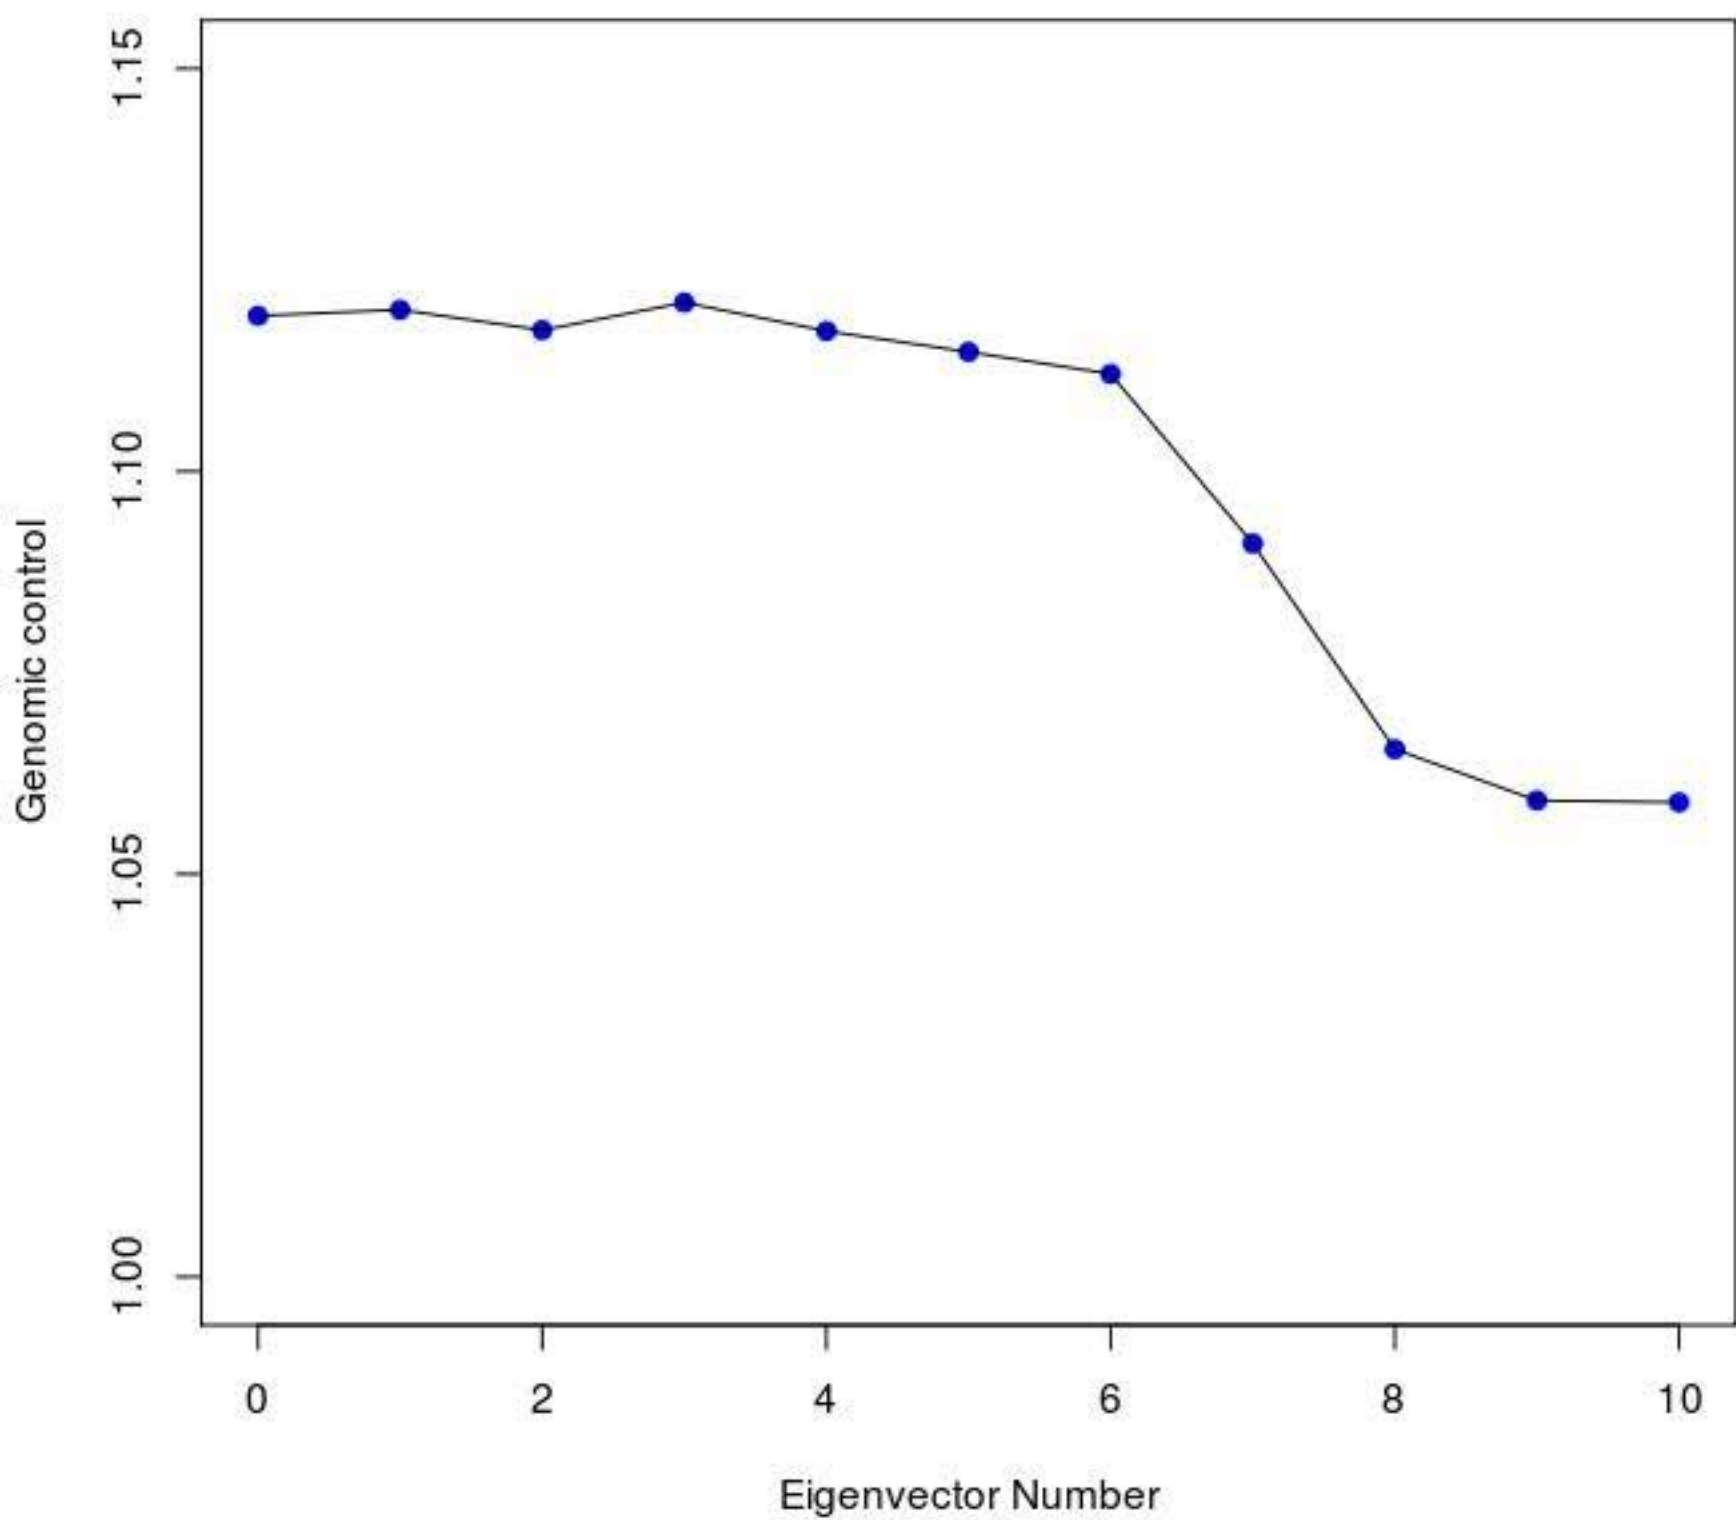**B.**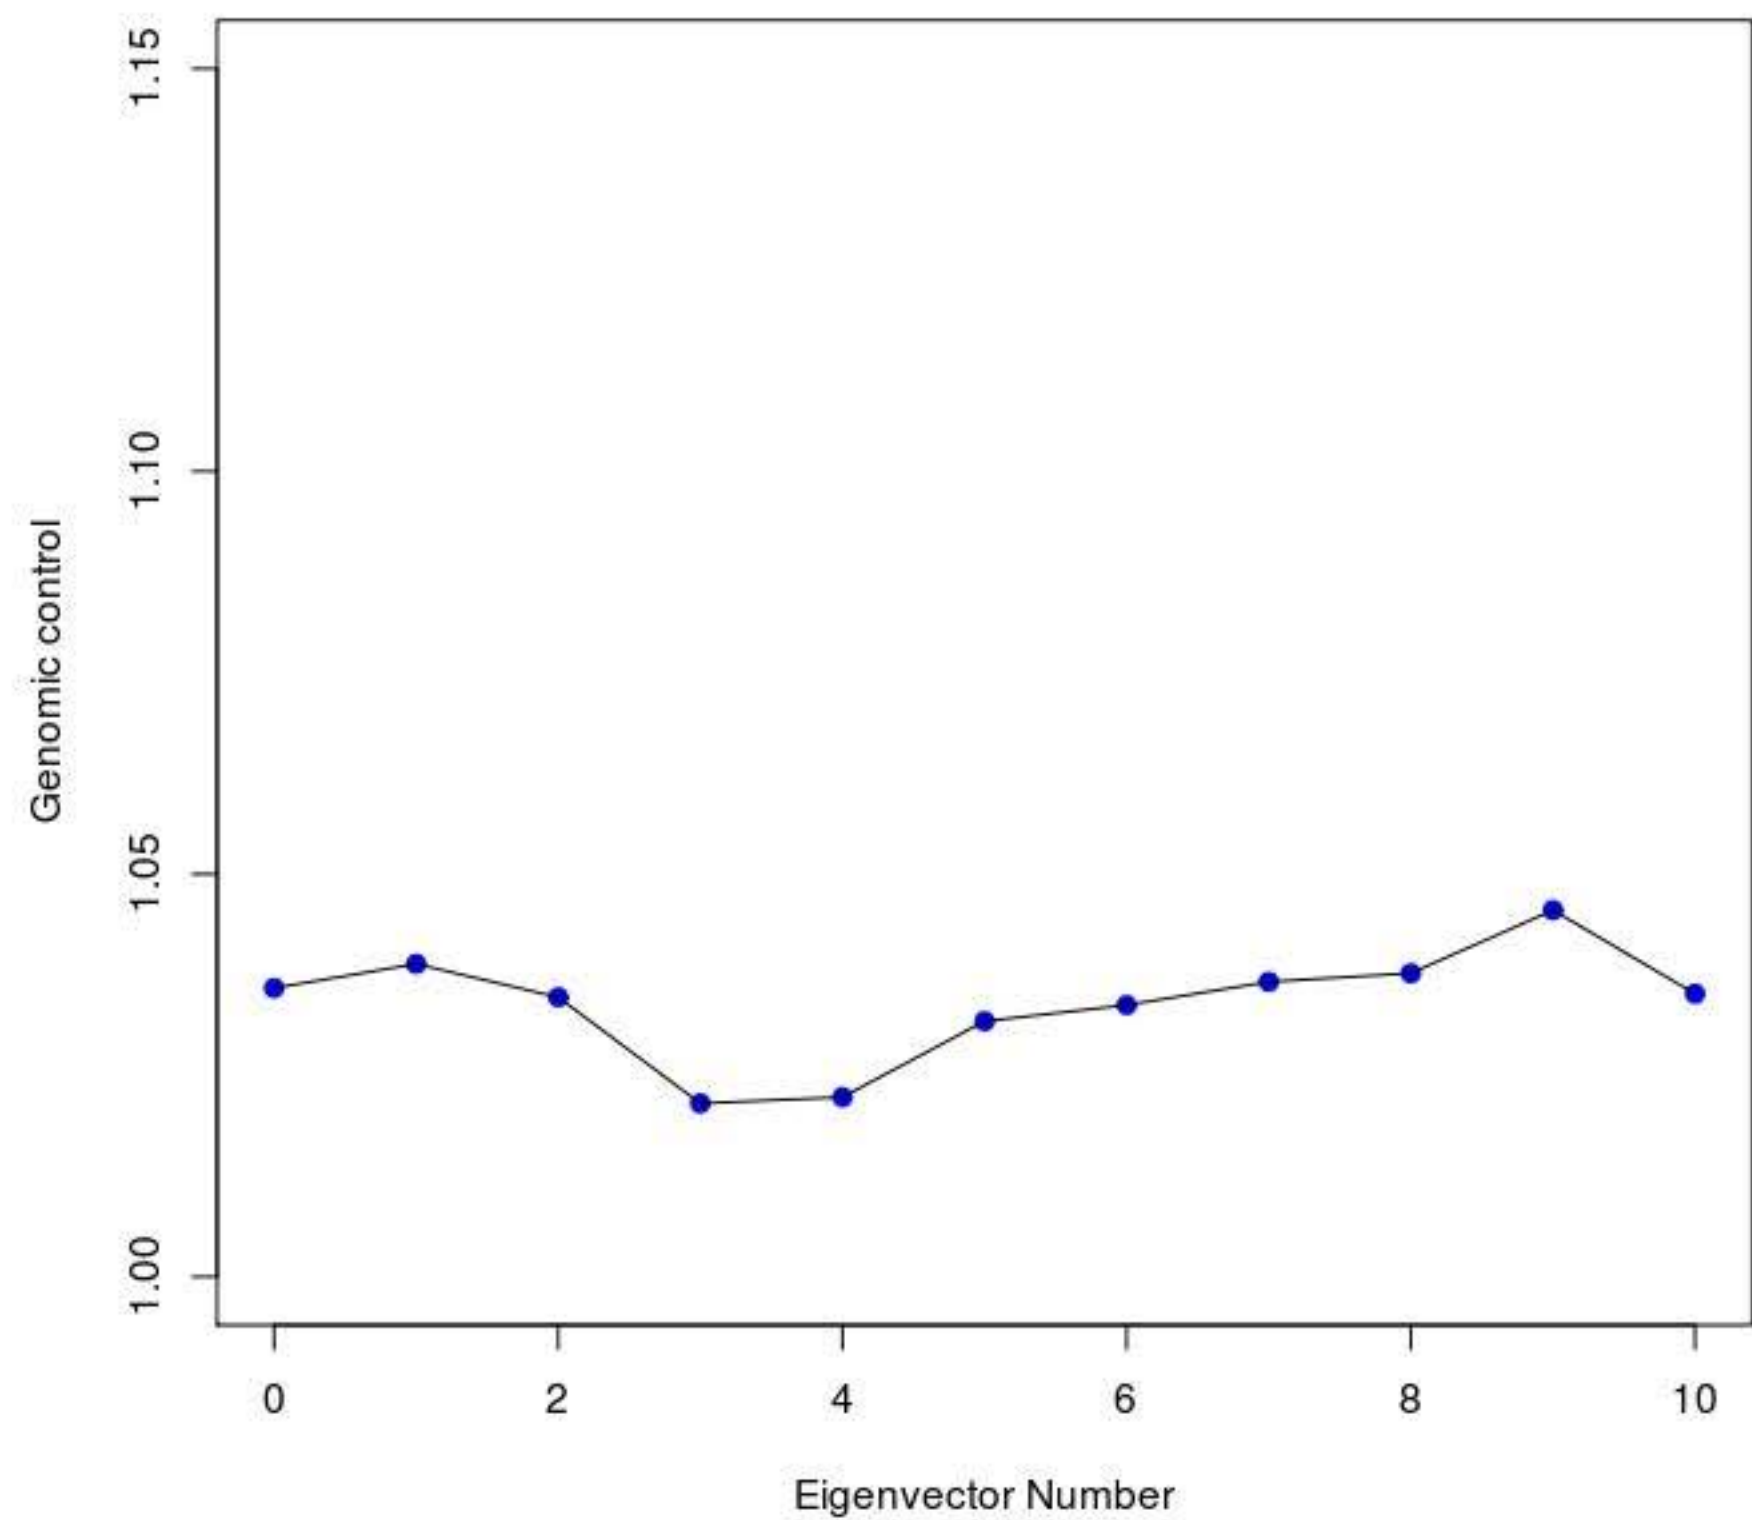

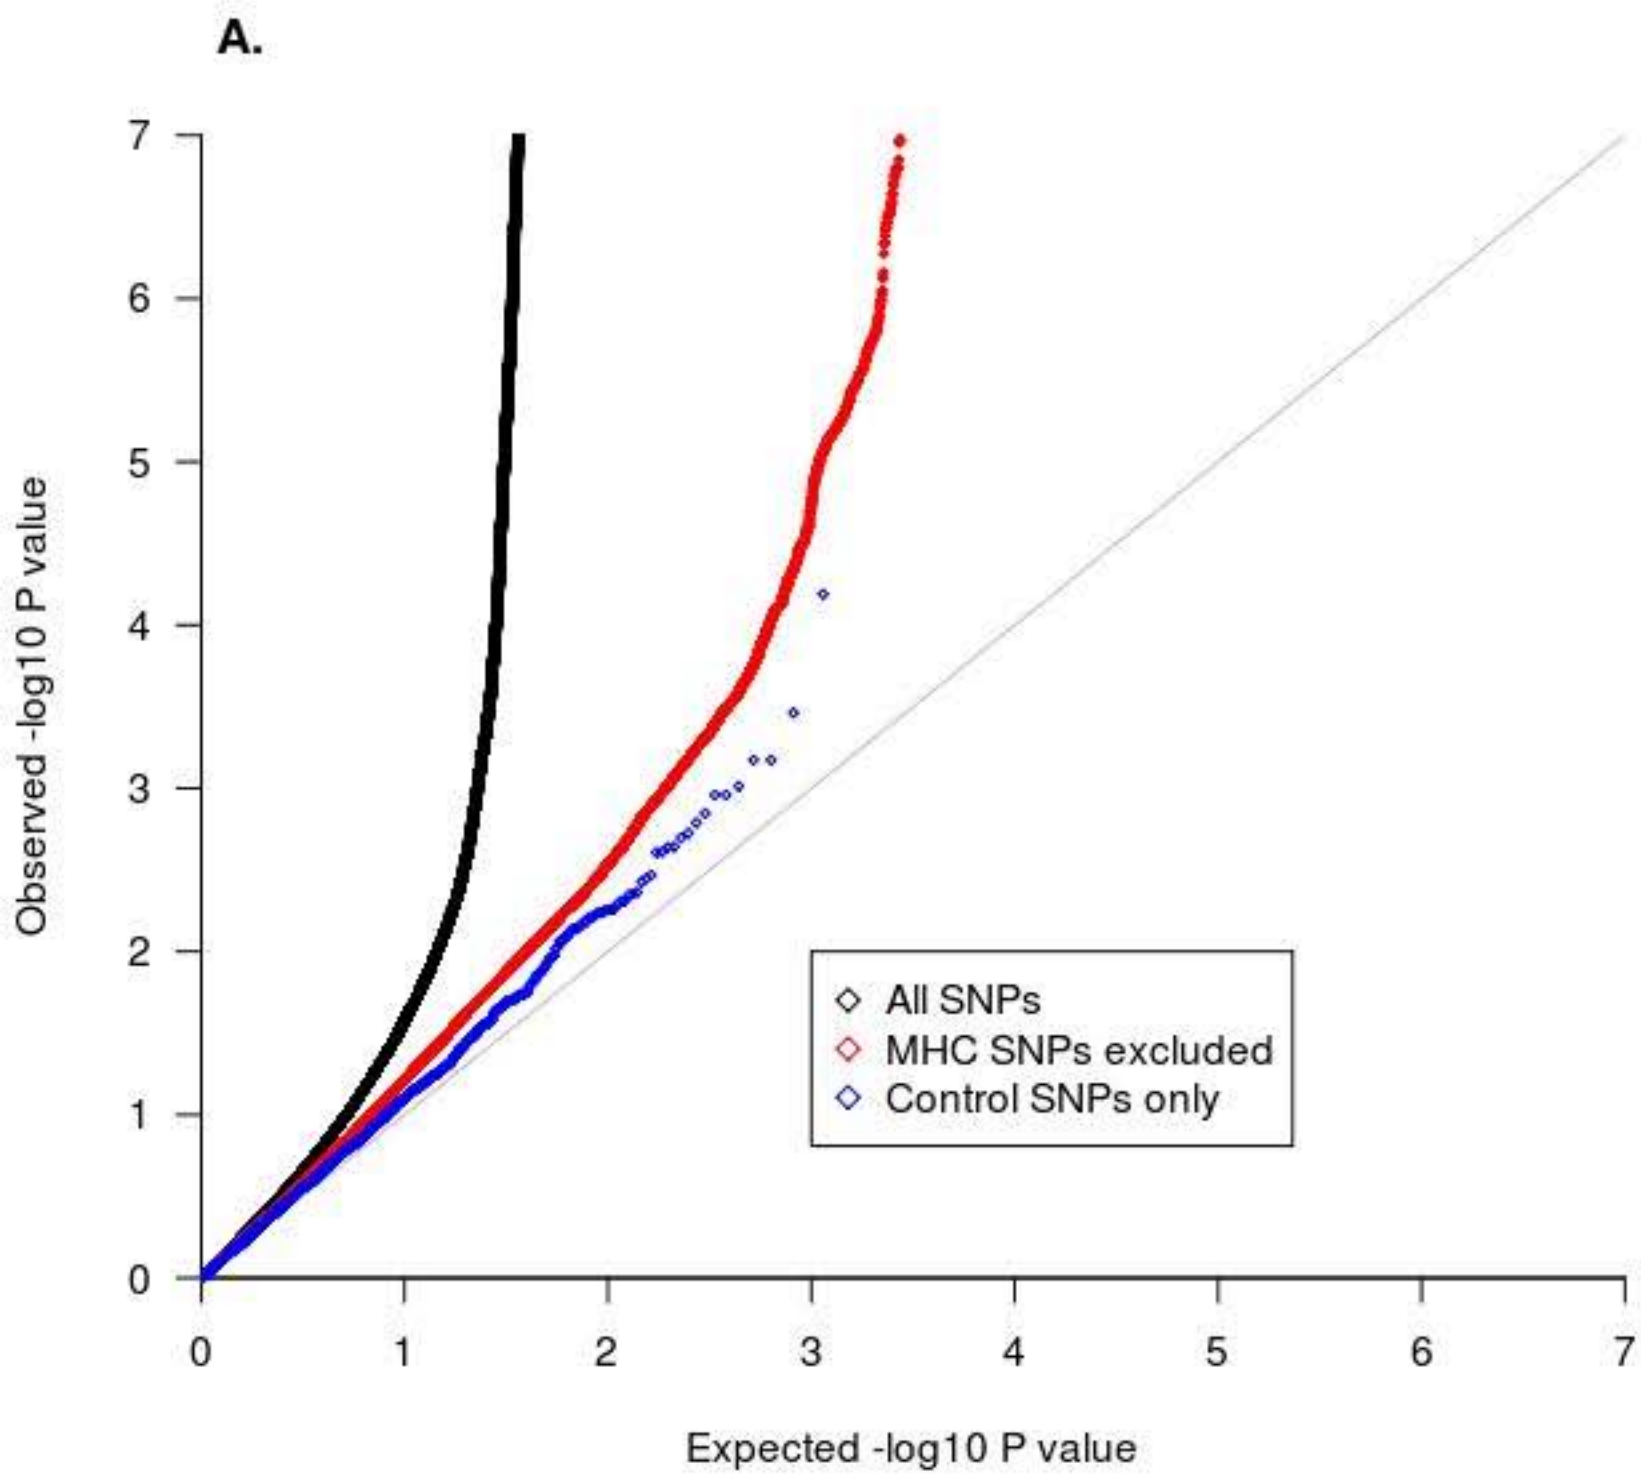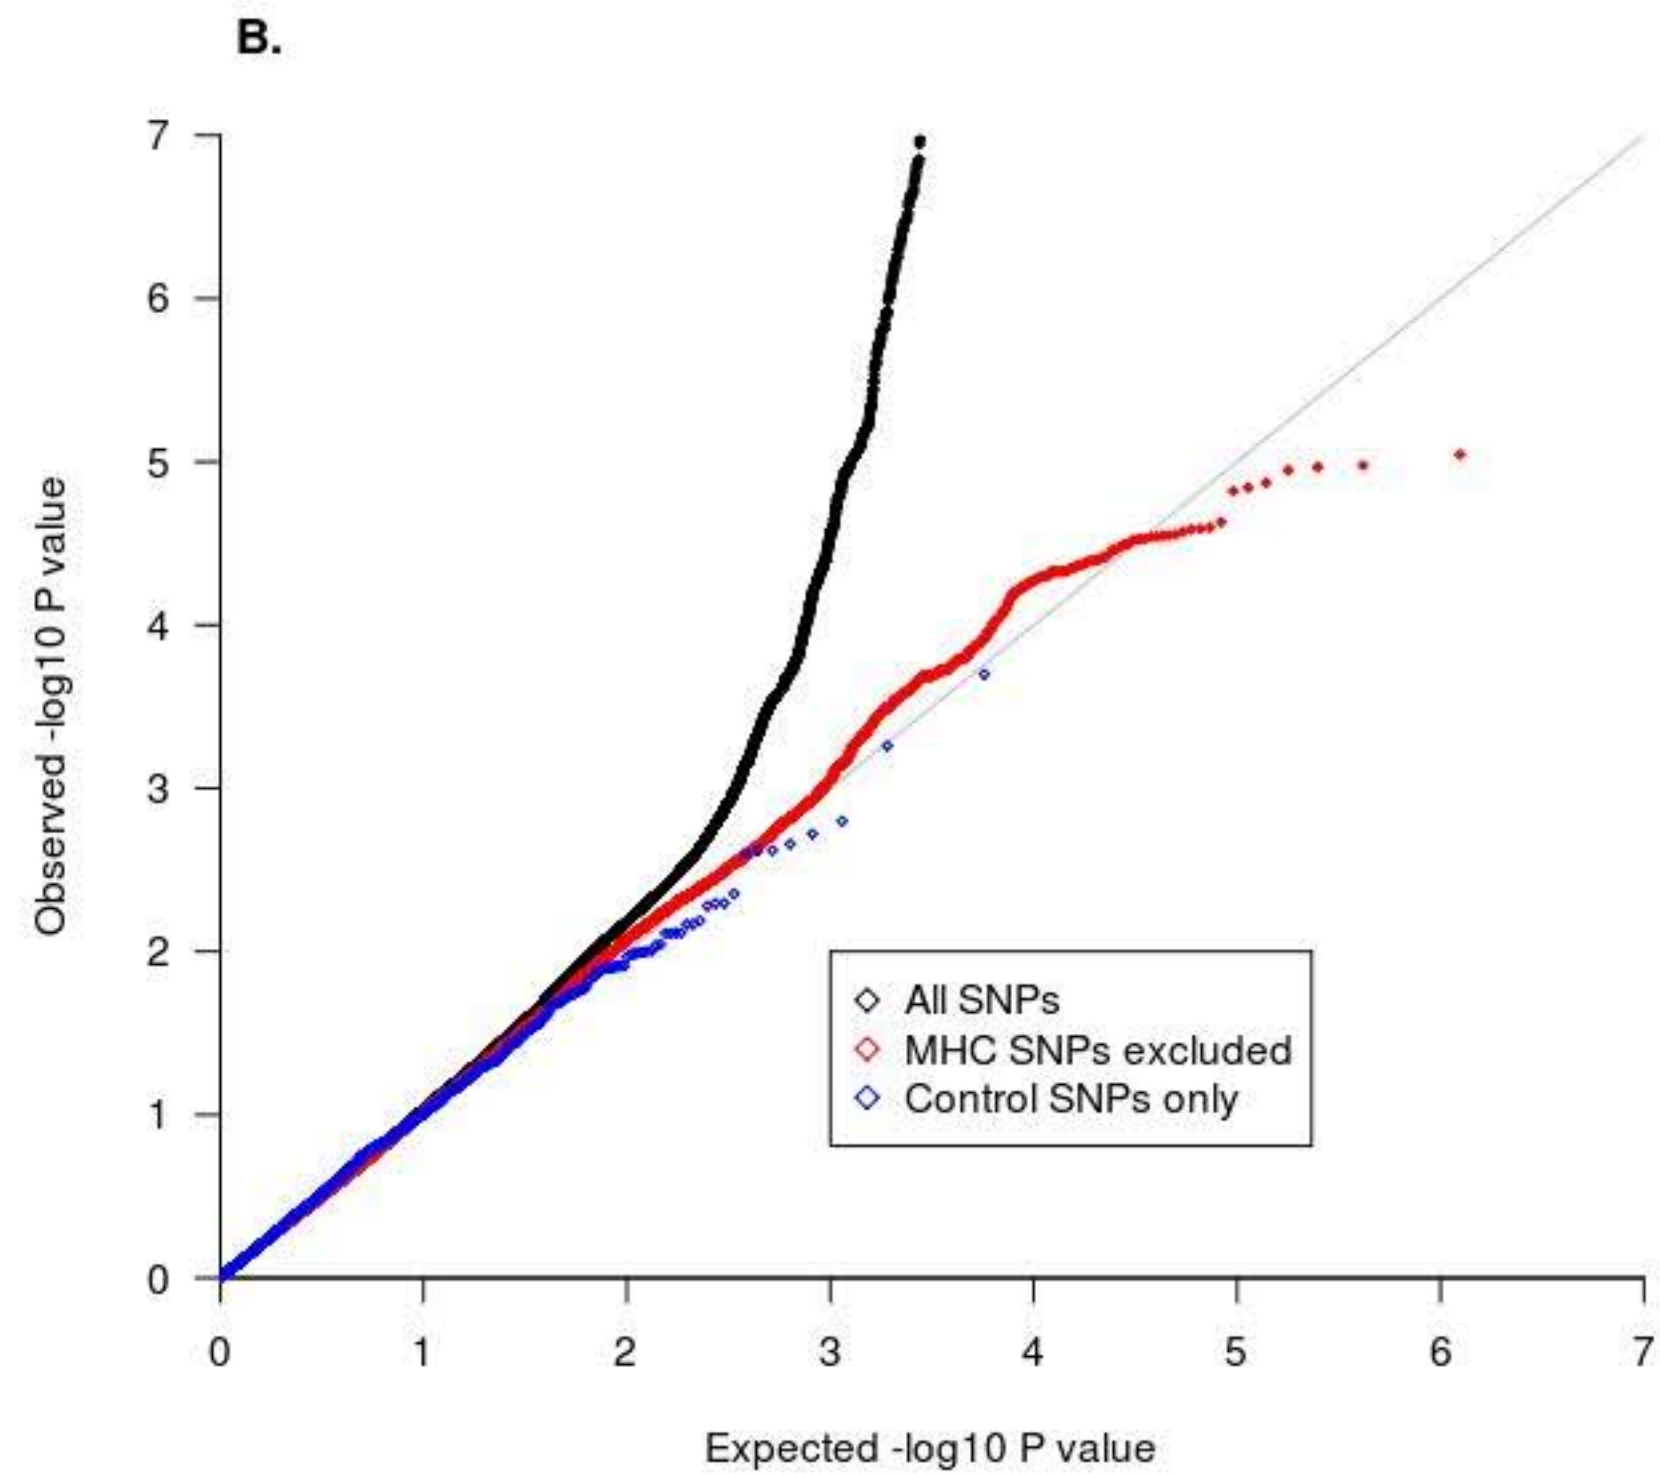

Supplementary Figure 3: AS with AAU versus AS without AAU Chromosome 6  
 SNP rs115879499 locus plot

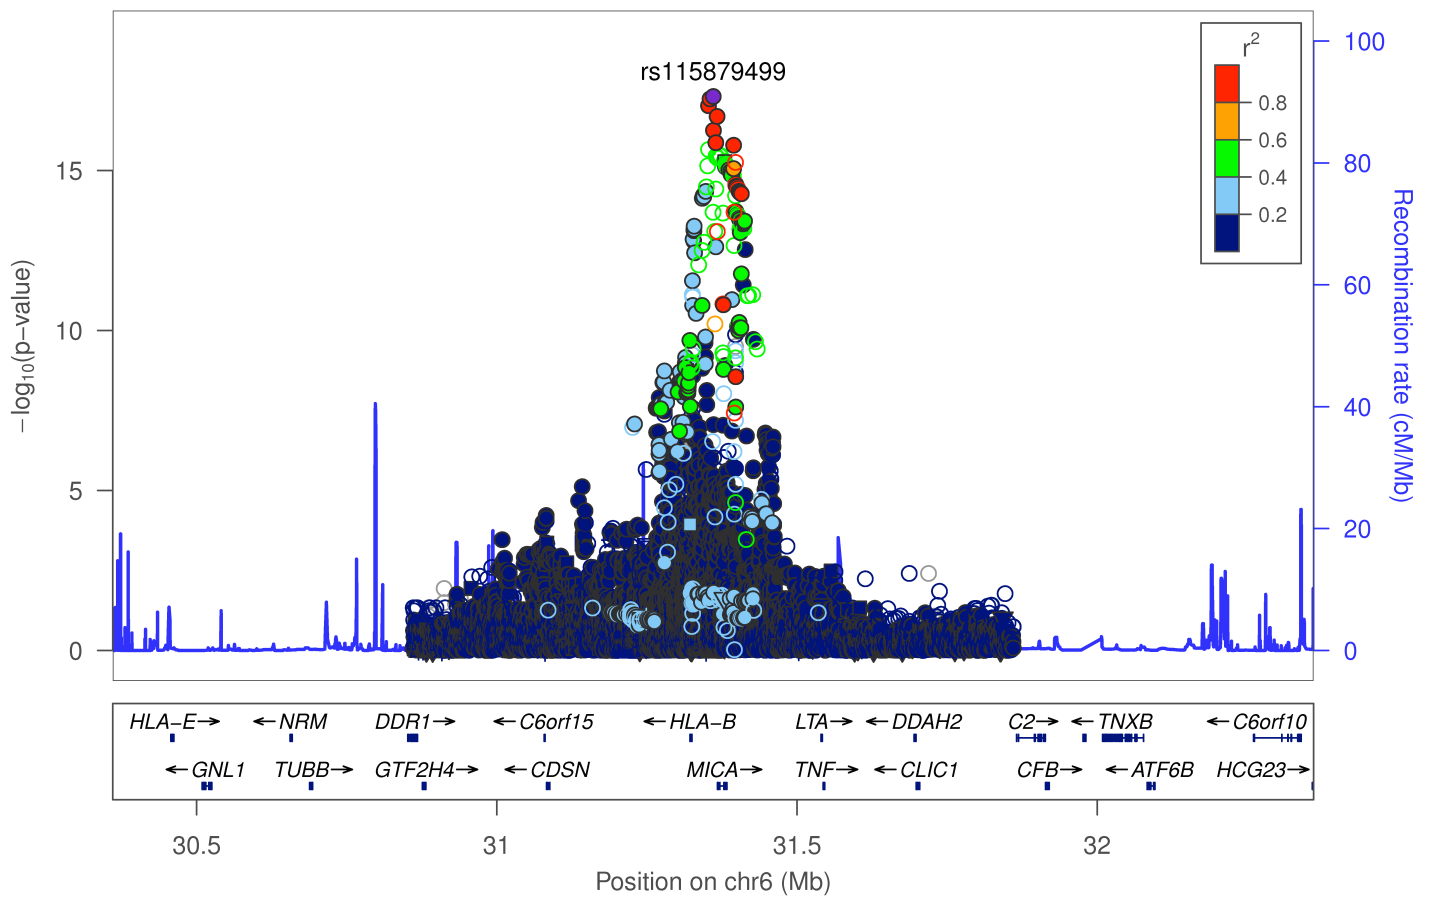

Supplementary Figure 4: AS with AAU versus AS without AAU Chromosome 5  
SNP rs2032890 locus plot

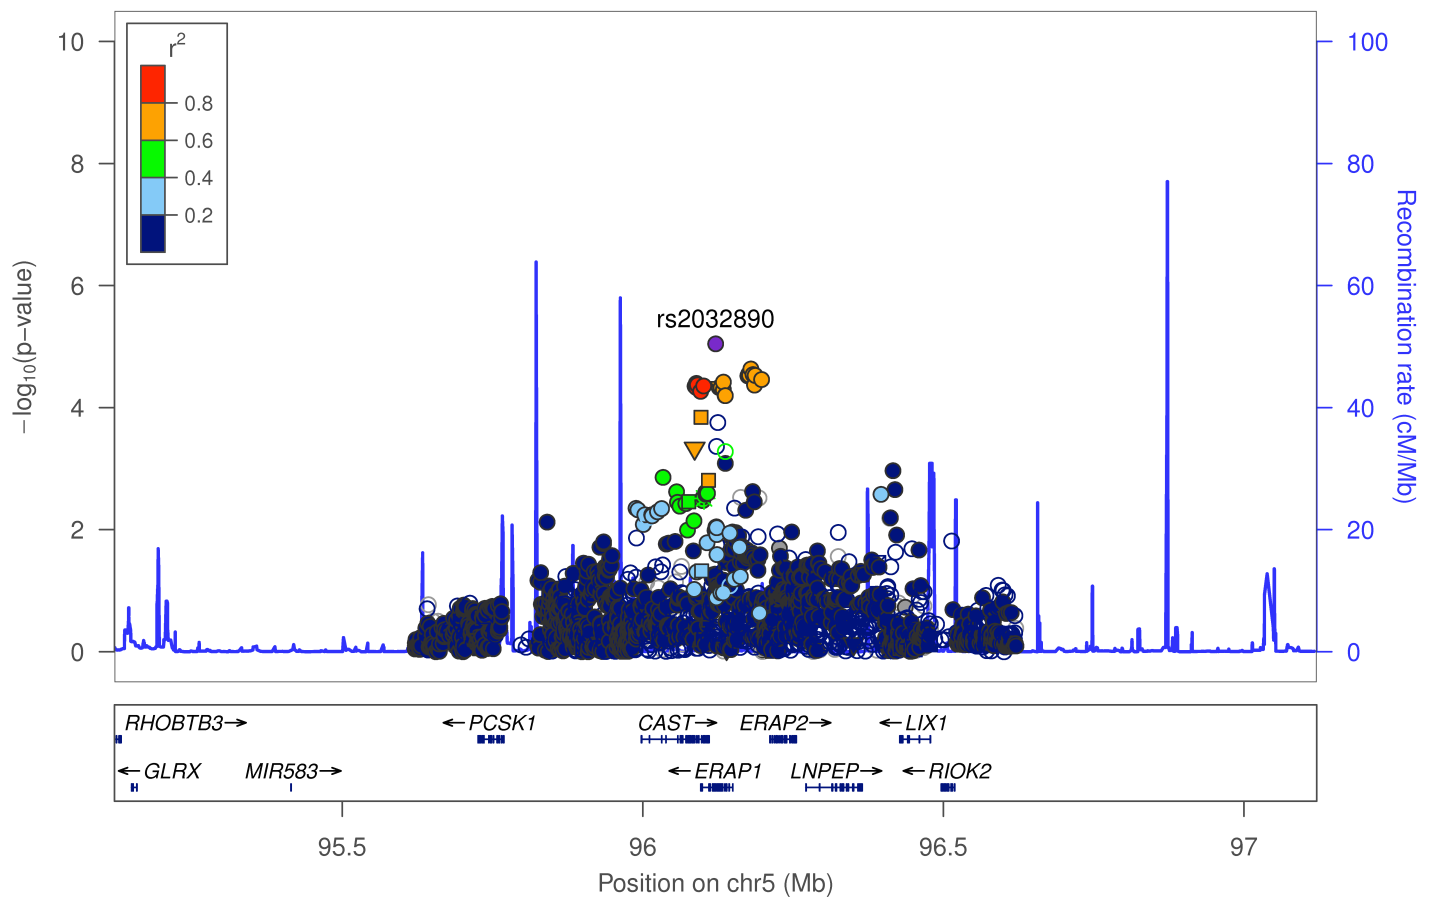

Supplementary Figure 5: All AAU versus healthy controls Chromosome 5  
SNP rs2032890 locus plot

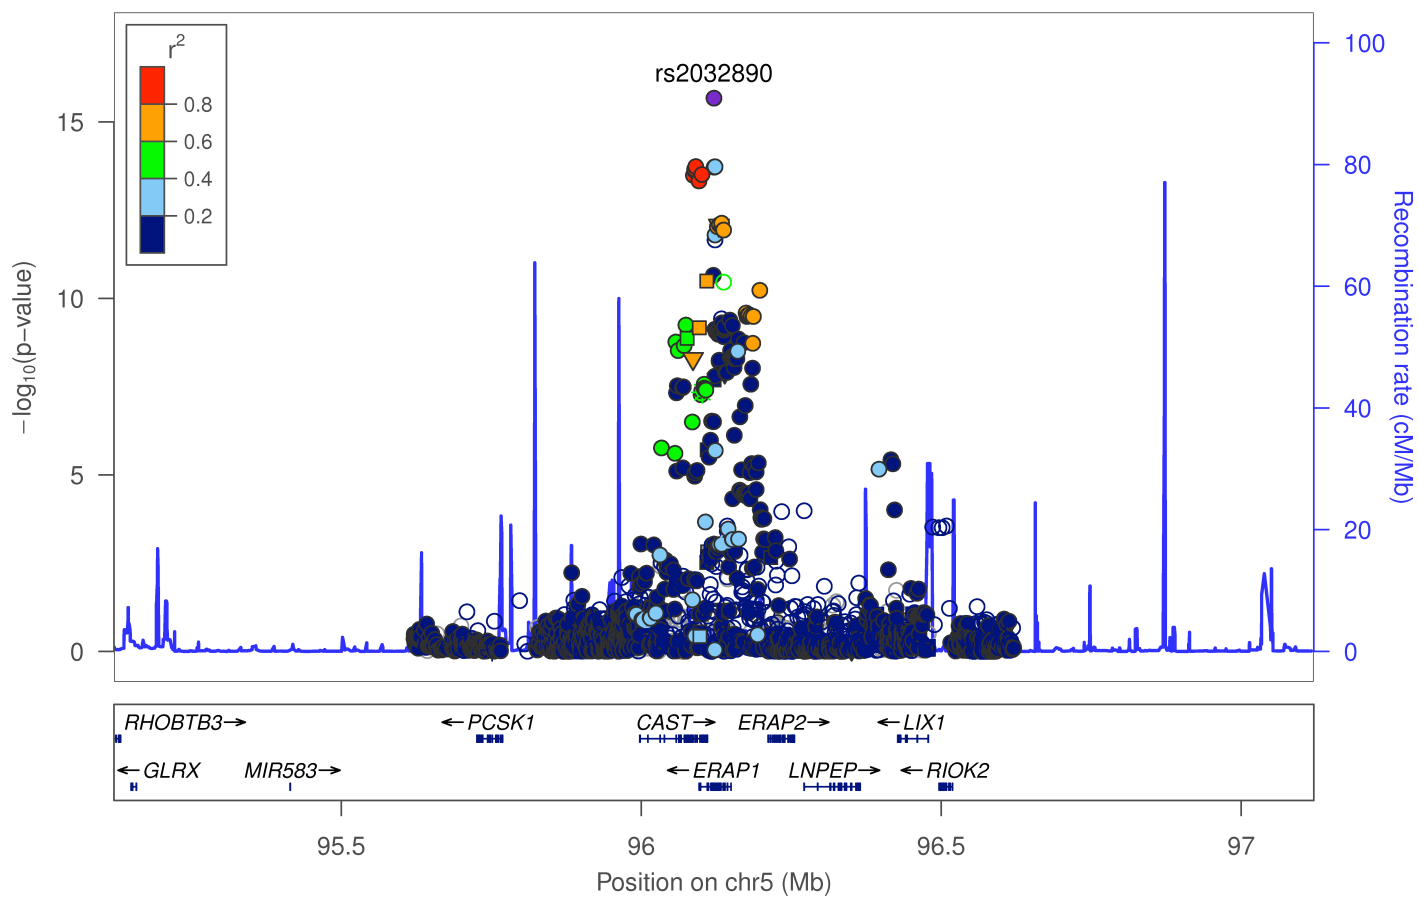

Supplementary Figure 6: All acute anterior uveitis versus healthy controls Chromosome 2  
SNP rs4672507 locus plot

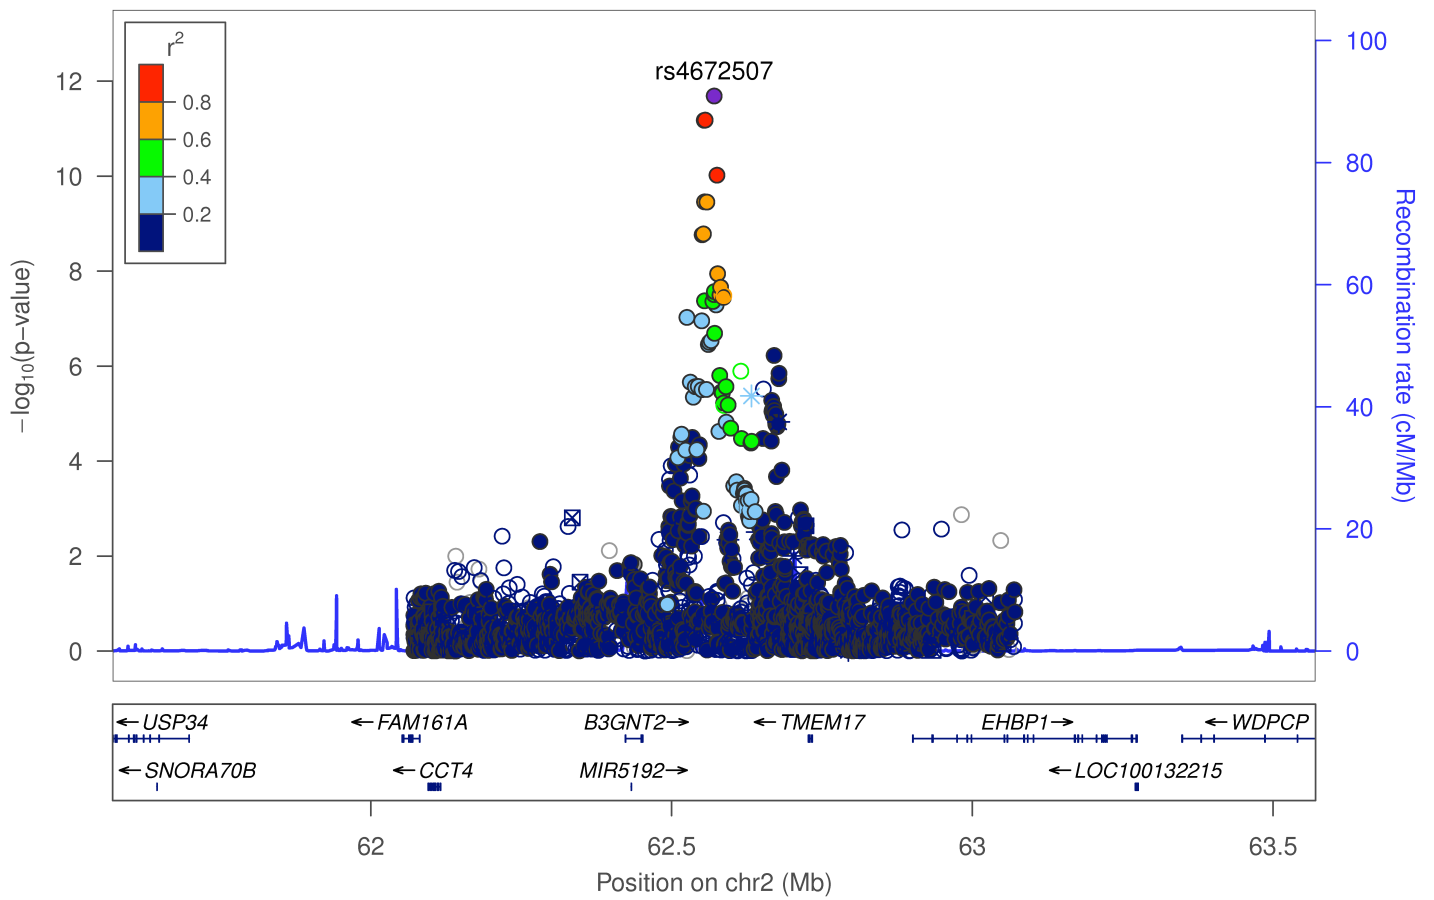

Supplementary Figure 7: All acute anterior uveitis versus healthy controls Chromosome 1  
SNP rs79755370 locus plot

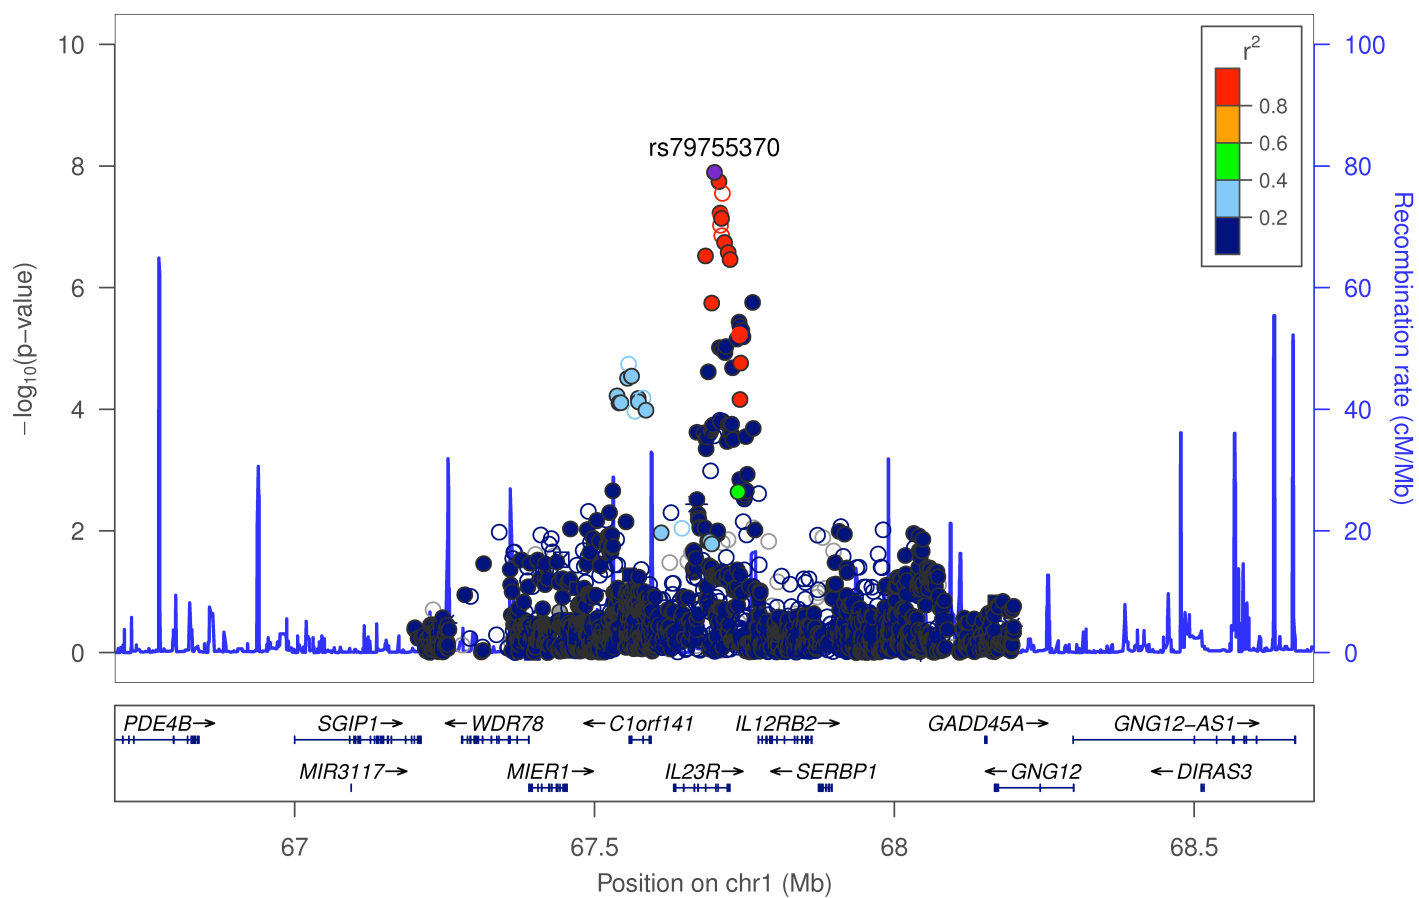

Supplementary Figure 8: All acute anterior uveitis versus healthy controls Chromosome 1  
SNP rs12132349 locus plot

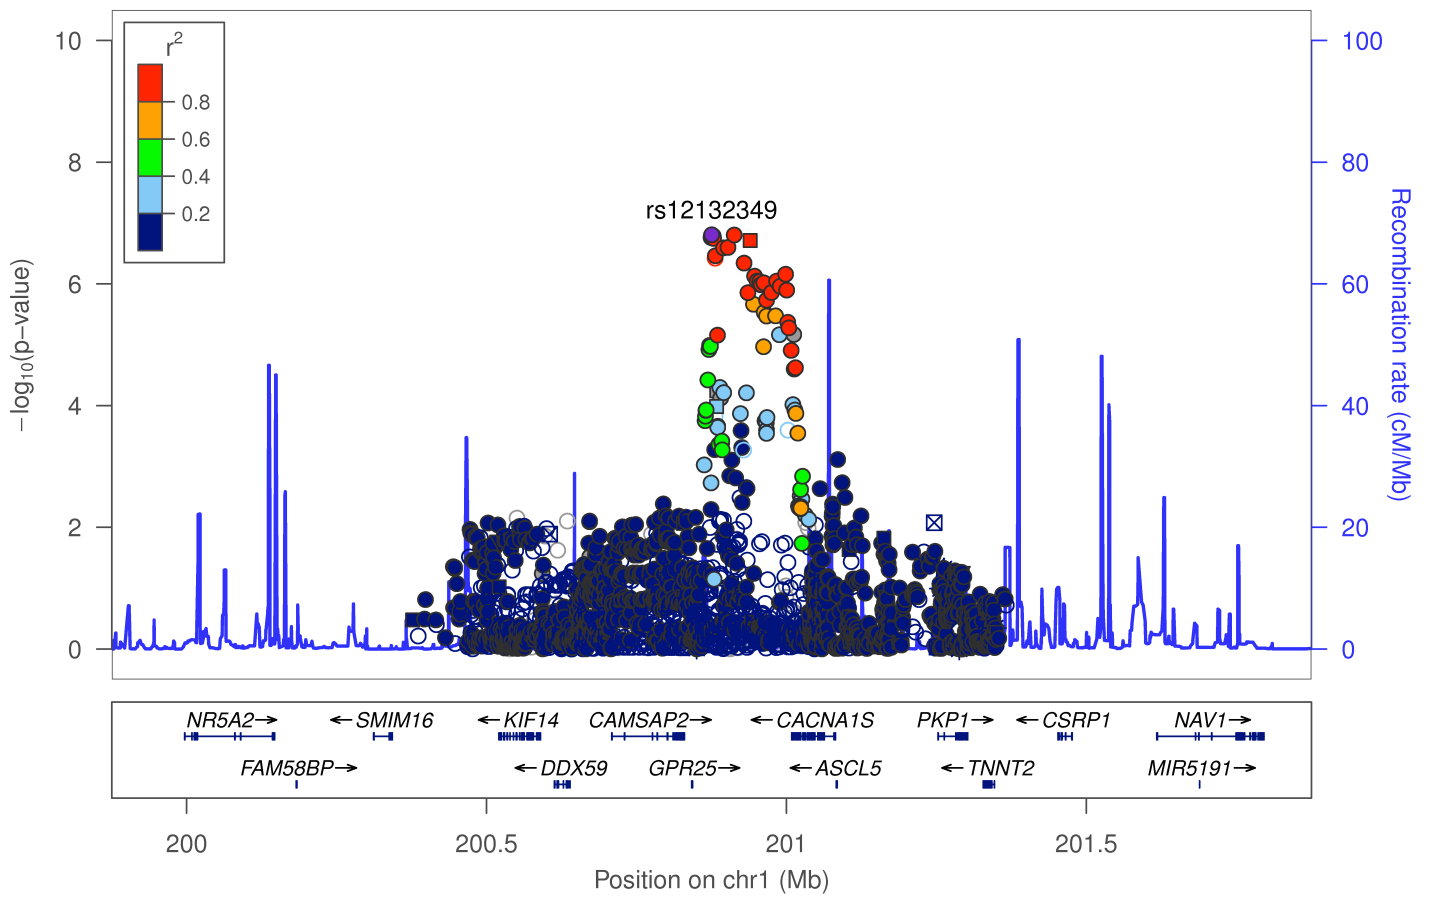



Supplementary Figure 9: All acute anterior uveitis versus healthy controls Chromosome 1  
 SNP rs6690230 locus plot

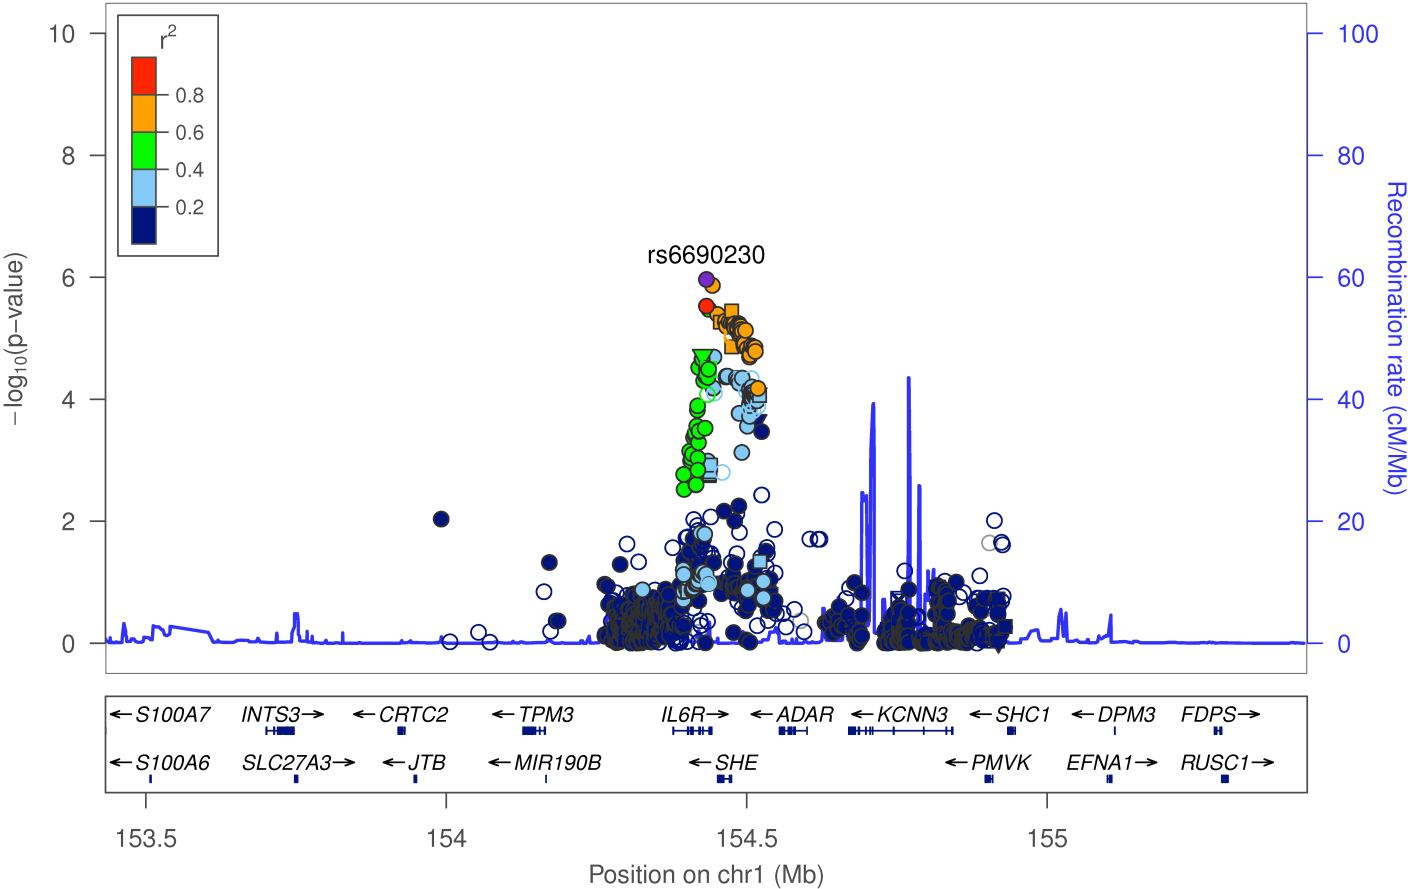

Supplementary Figure 10: All acute anterior uveitis versus healthy controls Chromosome 1  
SNP rs17351243 locus plot

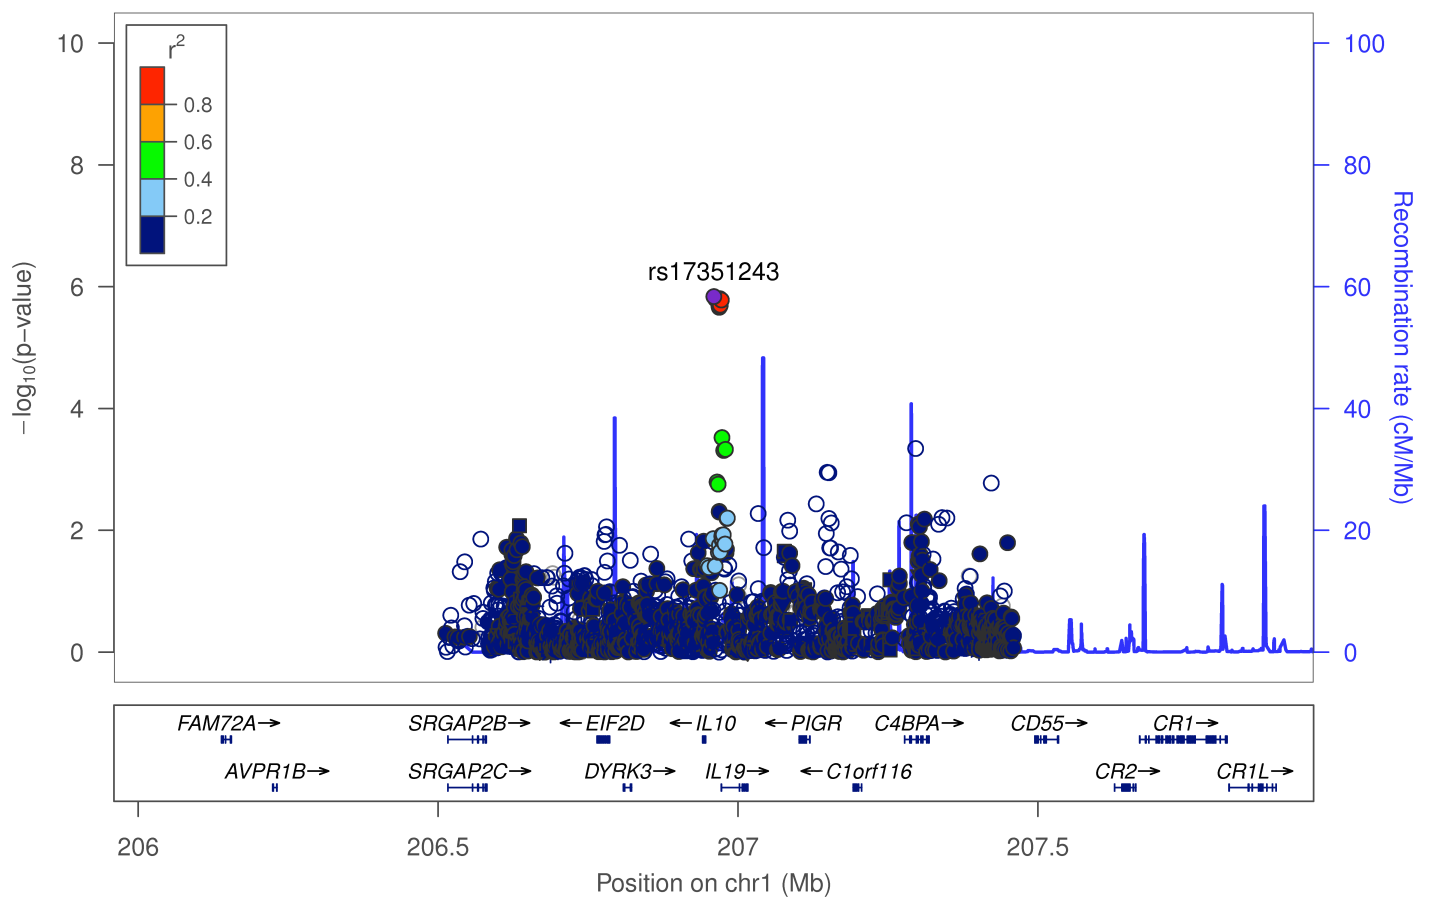

Supplementary Figure 11: All acute anterior uveitis versus healthy controls Chromosome 2  
SNP rs10197284 locus plot

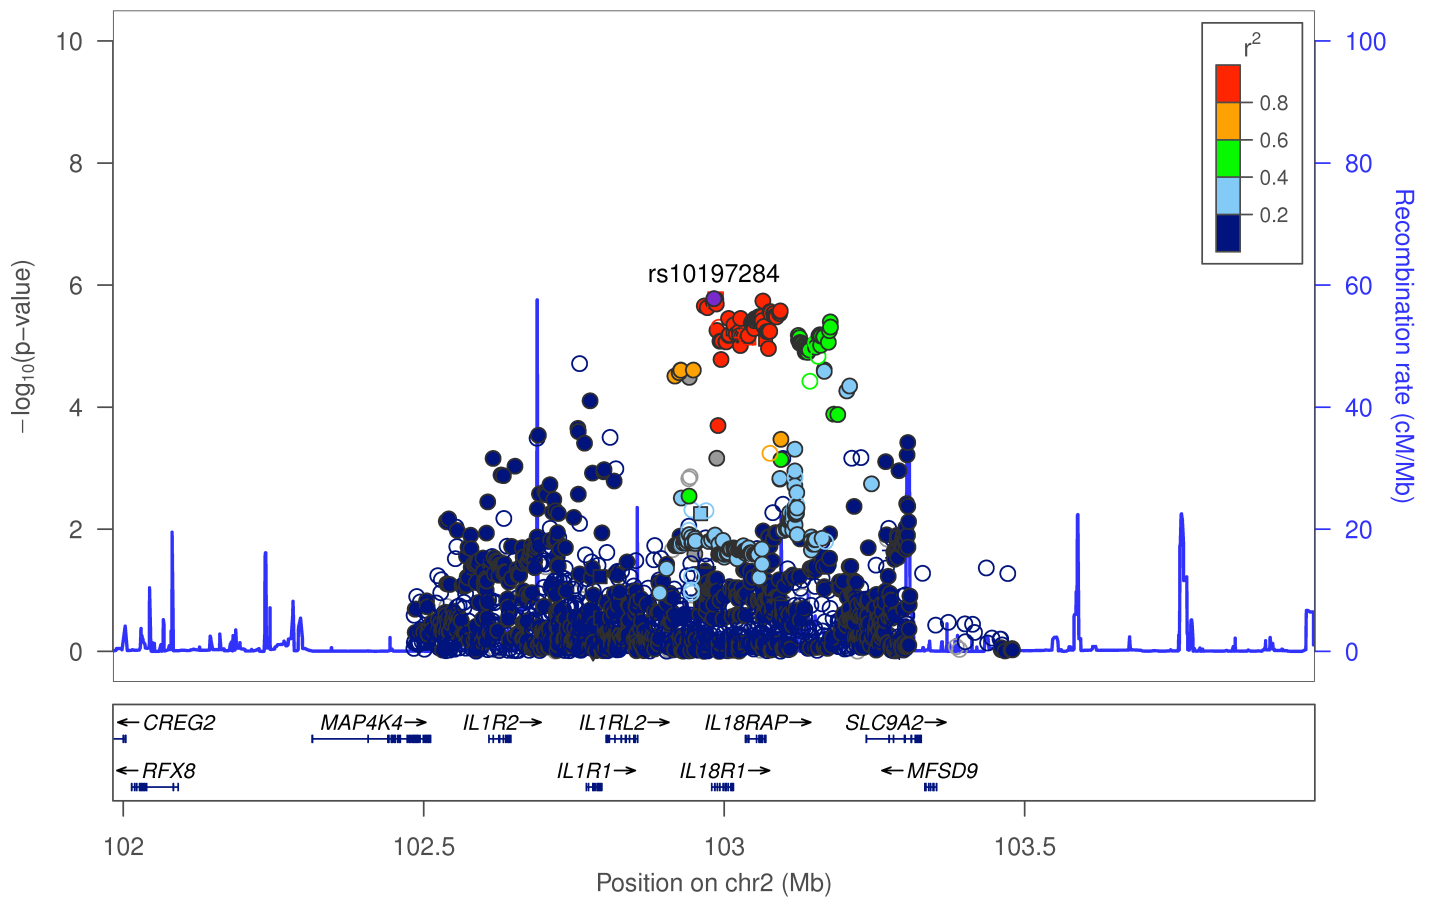

Supplementary Figure 12: All acute anterior uveitis versus healthy controls Chromosome 4  
SNP rs665873 locus plot

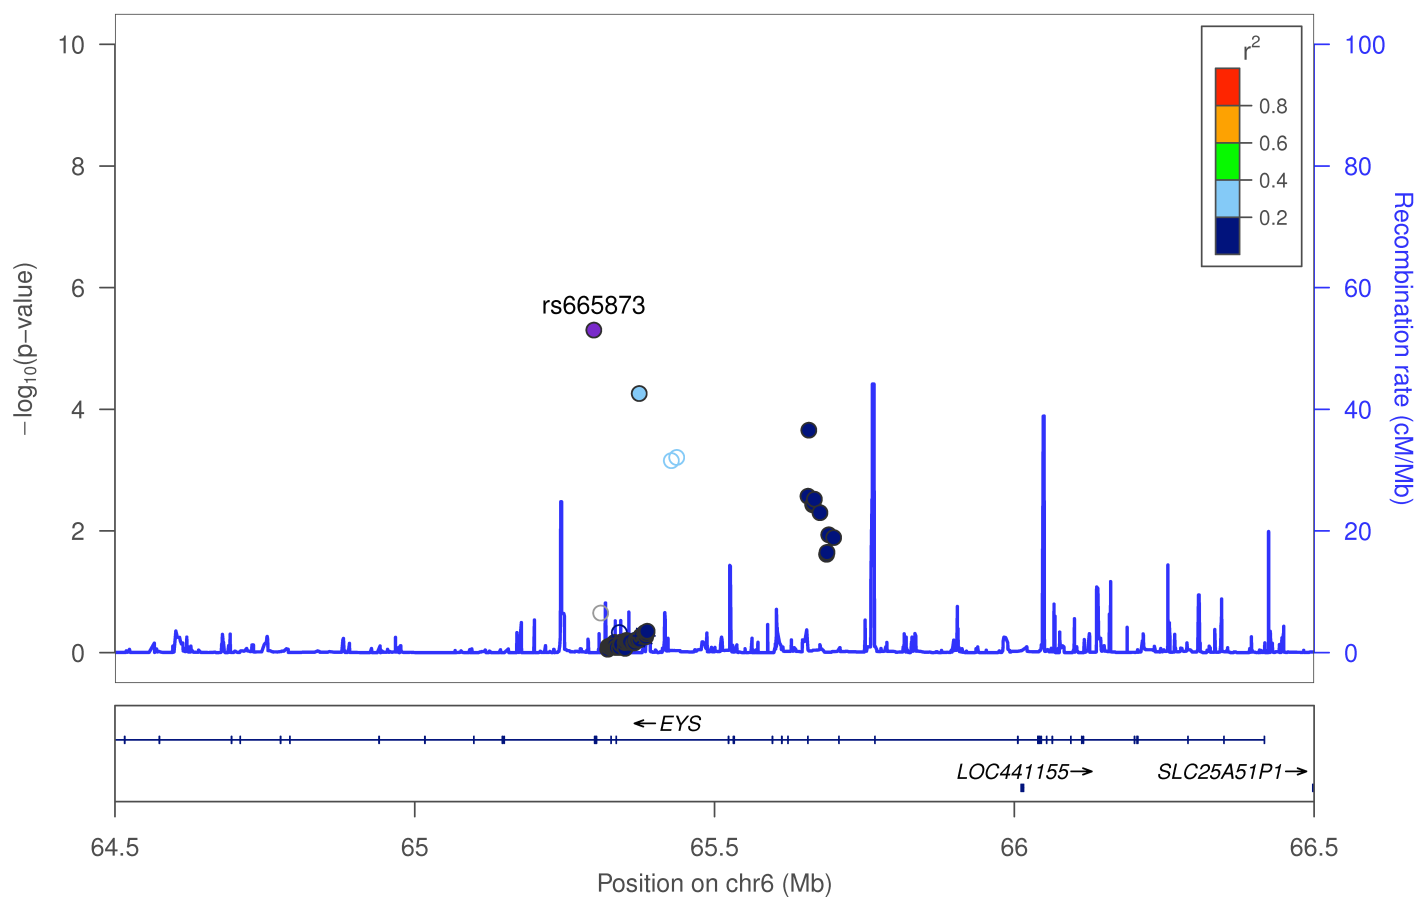

Supplement: NIHMS630736-supplement-Supp_FigureS1-S12.pdf [file NIHMS630736-supplement-Supp_FigureS1-S12.pdf]
